# Supplementary material for: Acute Retroviral Syndrome Is Associated With High Viral Burden, CD4 Depletion, and Immune Activation in Systemic and Tissue Compartments
Source: Oxford University Press journal article supplement (doi:10.1093/cid/cix1063), 2017-12-05
Supplement: cix1063_suppl_supplementary_figure_1.pdf [file cix1063_suppl_supplementary_figure_1.pdf]

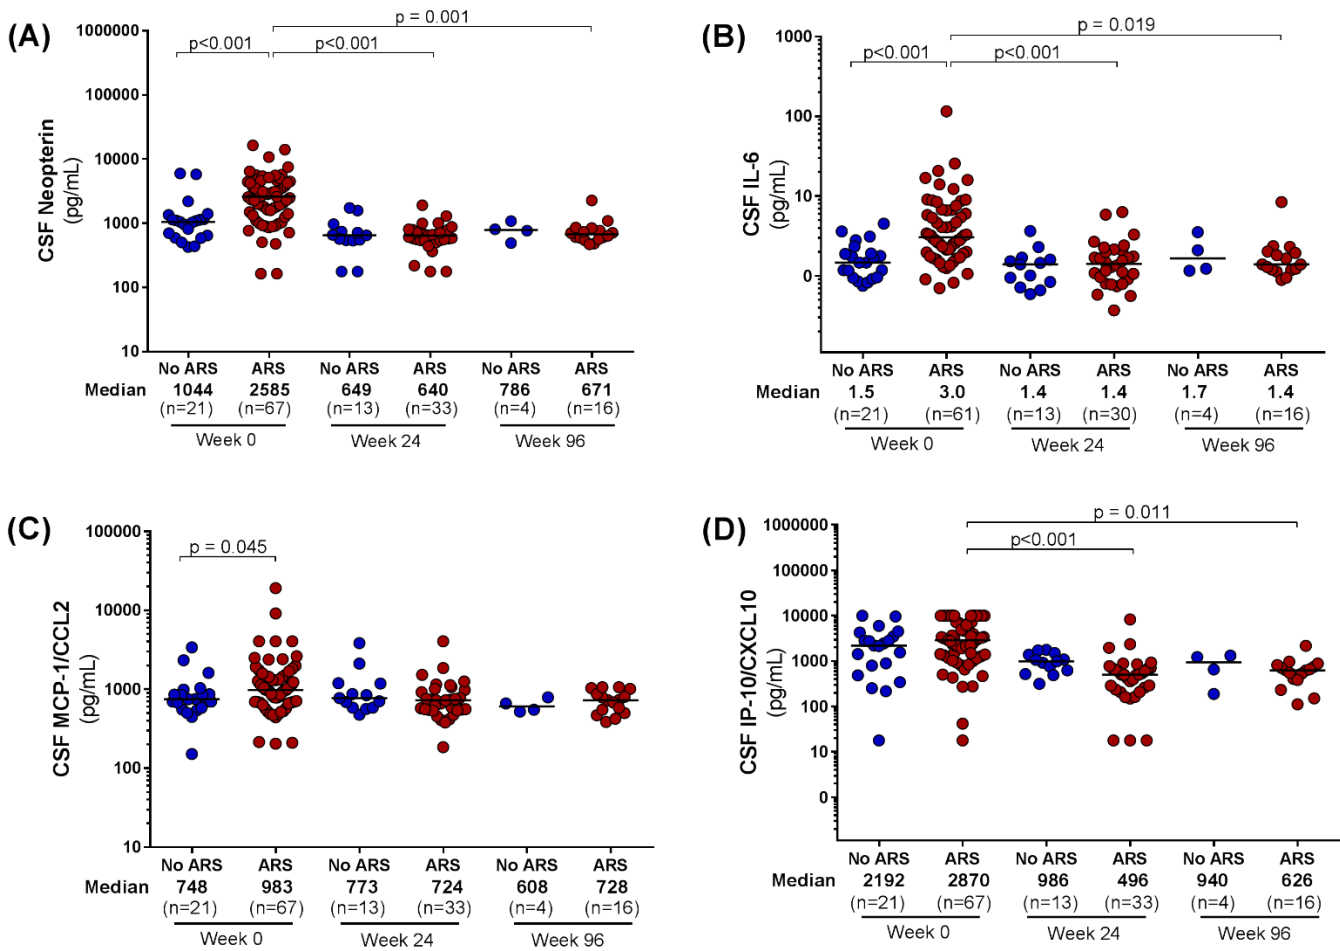

**Supplementary Figure 1. Markers of Inflammation in the Central Nervous System.**

Measurements of (A) neopterin, (B) IL-6, (C) MCP-1/CCL2, and (D) IP-10/CXCL10 in the cerebrospinal fluid during acute HIV infection (AHI) and after up to 96 weeks of ART are compared between participants with and without acute retroviral syndrome during AHI.

Statistically significant pairwise comparisons ( $p < 0.05$ ) are identified.
